# Supplementary material for: Application of soot discharged from the combustion of marine gas oil as an anode material for lithium ion batteries
Source: Royal Society of Chemistry journal article supplement (doi:10.1039/d0ra07195a), 2020-01-01
Supplement: d0ra07195a1.pdf [file d0ra07195a1.pdf]

Supplementary Materials

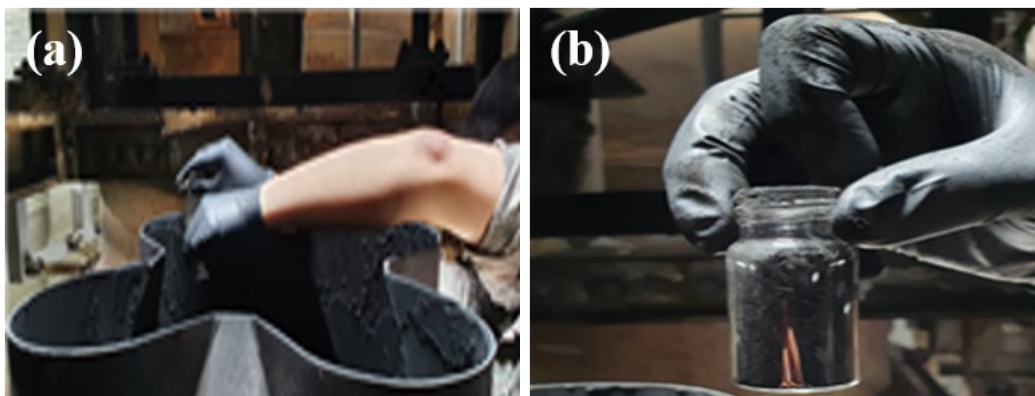

Figure S1. (a) Soot sampling and (b) the soot used in this research.

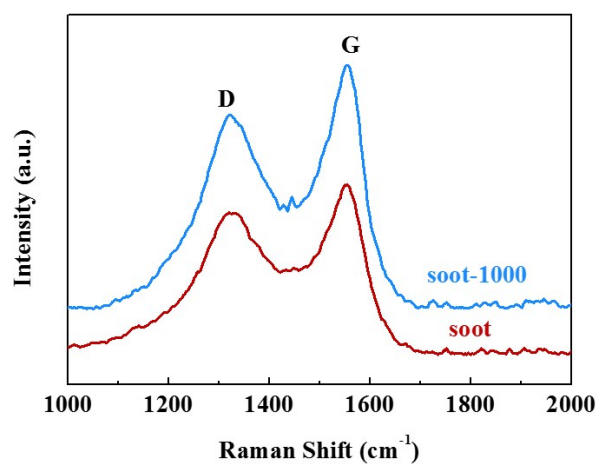

Figure S2. Raman spectra of soot and soot-1000.

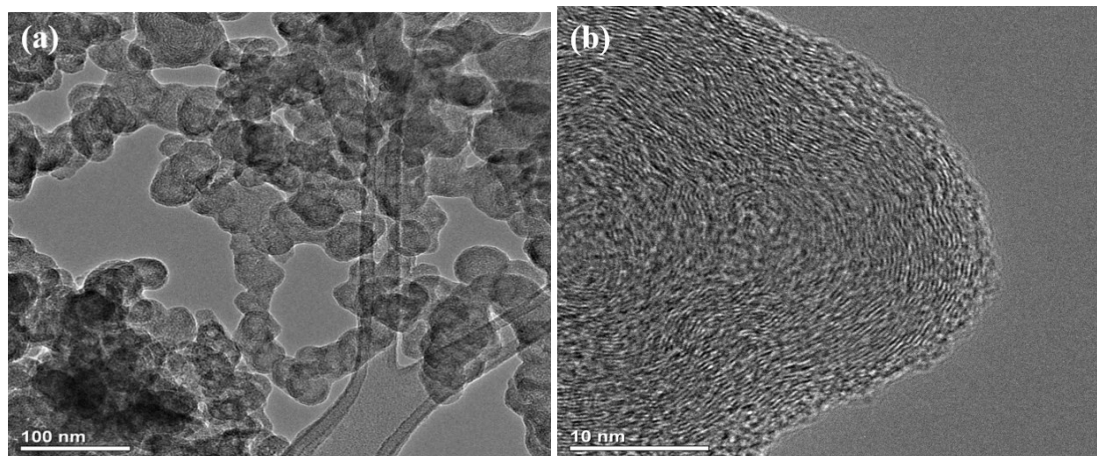

Figure S3. (a) TEM and (b) HR-TEM images of soot.

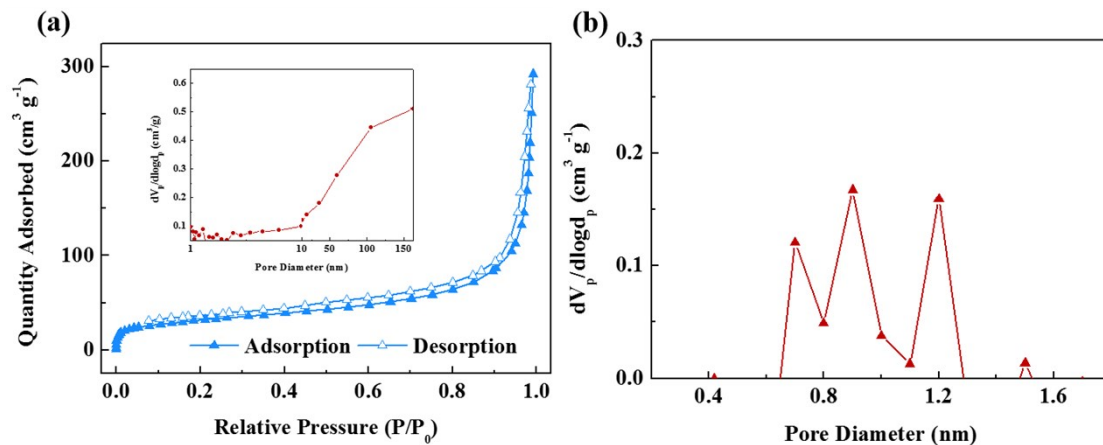

Figure S4. (a) Nitrogen sorption isotherm of soot (inset: BJH pore size distribution) and (b) micropore size distribution calculated from adsorption isotherms using the MP method.

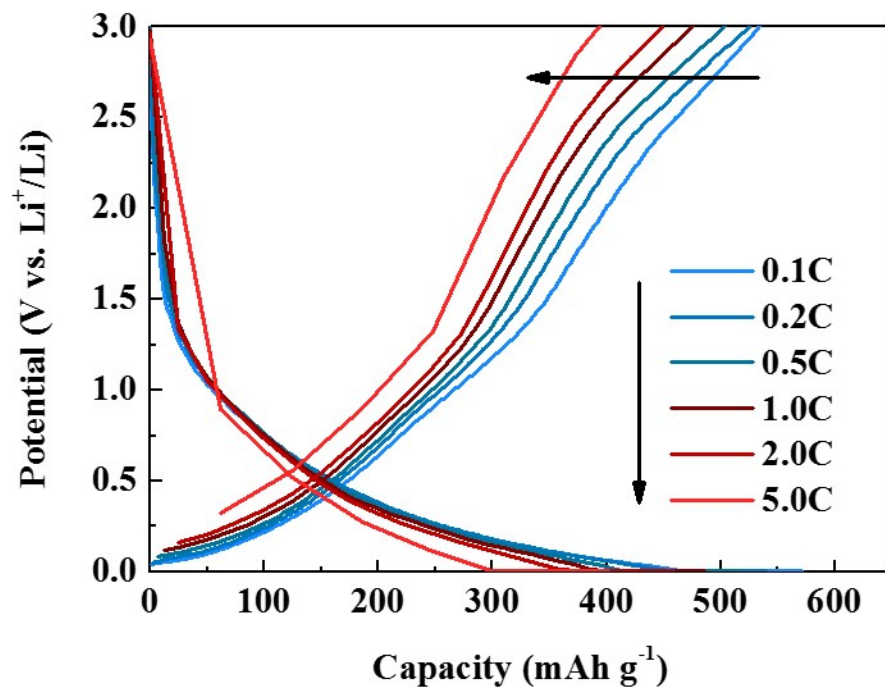

Figure S5. Charge/discharge profiles of soot-1000 from 0.1 to 5.0C.

Table S1. Specifications of MGO for naval ships (test results)

| Test Item                                             | Result |
|-------------------------------------------------------|--------|
| API Gravity<br>(American Petroleum Institute Gravity) | 36.6   |
| Density at 15 °C (kg/m <sup>3</sup> )                 | 841.3  |
| Flash Point (°C) (m <sup>3</sup> /s)                  | 61.0   |
| Kinematic Viscosity at 40 °C (mm <sup>2</sup> /s)     | 3.357  |
| Sulfur Mass (%)                                       | 0.0187 |
| Cloud Point (°C)                                      | 3.0    |
| Pour Point (°C)                                       | -24.0  |

Table S2. Specifications of diesel engine

| MTU 12V 1163 TB83       |                |
|-------------------------|----------------|
| Parameters              | Specification  |
| Power                   | 3,600 kW       |
| rpm                     | 1,250          |
| Compression Ratio       | 12:1           |
| Bore                    | 23 cm          |
| Stroke                  | 28 cm          |
| Mean Effective Pressure | 25.9 bar       |
| Maximum Pressure        | 195.4 bar      |
| Fuel Consumption        | 185 g/kWh ± 5% |
|                         | ~              |
|                         | 225 g/kWh ± 5% |

**Table S3.** Comparison of electrical properties of various carbon materials derived from different precursors.

| No | Carbon source     | $A_{\text{BET}}$<br>( $\text{m}^2 \text{g}^{-1}$ ) | Initial<br>Coulombic<br>efficiency<br>(%) | Current density        | Capacity<br>( $\text{mAh g}^{-1}$ ) | Ref       |
|----|-------------------|----------------------------------------------------|-------------------------------------------|------------------------|-------------------------------------|-----------|
| 1  | Battleship's soot | 157.83                                             | 57                                        | 1C                     | 781                                 | This work |
| 2  | Rice hull         | 332                                                | 43.77                                     | 2C                     | 281                                 | 1         |
| 3  | Wheat flour       | ca. 262                                            | < 50                                      | 1C                     | 728                                 | 2         |
| 4  | Corn stalk core   | 393.87                                             | 52.89                                     | 0.2C                   | 743                                 | 3         |
| 5  | Garlic peel       | 1710                                               | 41                                        | 100 $\text{mA g}^{-1}$ | 570                                 | 4         |
| 6  | Prawn shell       | 336                                                | -                                         | 2C                     | 470                                 | 5         |
| 7  | Unburned charcoal | 22.168                                             | 60.8                                      | 100 $\text{mA g}^{-1}$ | 350                                 | 6         |
| 8  | Sweet potato      | 79.1                                               | < 50                                      | 100 $\text{mA g}^{-1}$ | 320                                 | 7         |
